# Supplementary material
Source: Springer Nature journal article supplement (https://www.springermedizin.de/resource/supplementary/13075_2004_1584_MOESM6_ESM.pdf/9690110)

Percent serious AE with celecoxib (any dose)

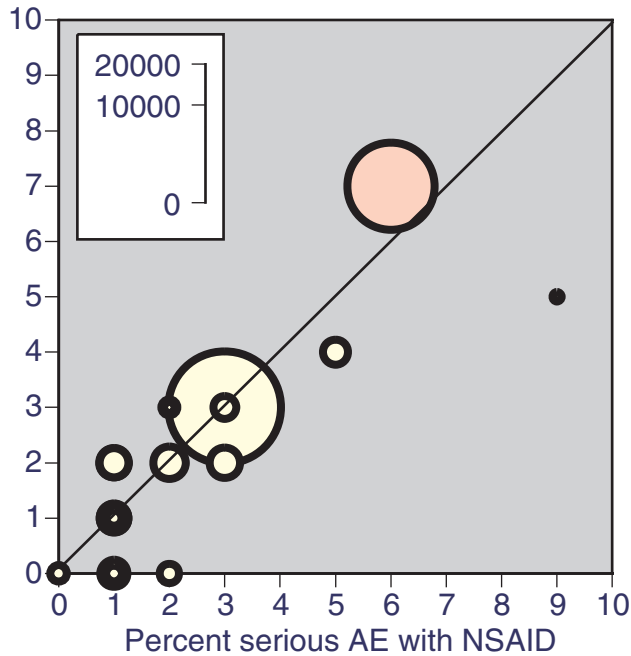

Supplement: MOESM6 [file 9690110]
